# Supplementary material for: Haploinsufficiency of A20 impairs protein–protein interactome and leads into caspase-8-dependent enhancement of NLRP3 inflammasome activation
Source: PubMed Central journal article supplement — RMD Open. 2018 Oct 17;4(2):e000740. doi: 10.1136/rmdopen-2018-000740 (PMC6203104; doi:10.1136/rmdopen-2018-000740), 2018-10-17

AP-MS

Flp-In T-REx 293

Strep-BioID A20 (wt/K91X)

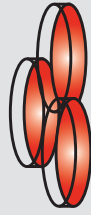

Single-step Strep-purification

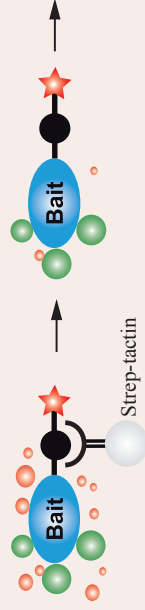

LC-MS/MS analysis

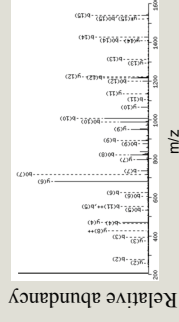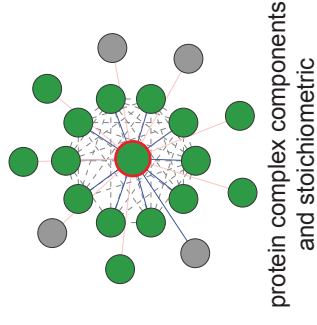

BioID

biotin addition

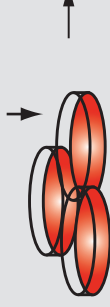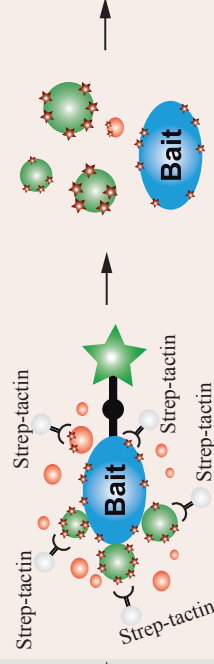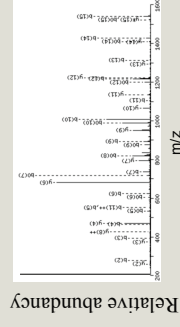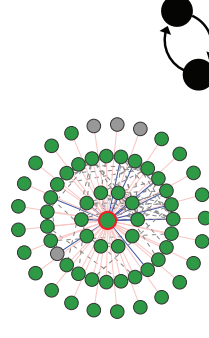

Supplement: rmdopen-2018-000740supp001.pdf [file rmdopen-2018-000740supp001.pdf]
